# Supplementary material
Source: HighWire-hosted journal article supplement (doi:10.1101/rna.067090.118)
Supplement: Supplemental_Legends.docx [file Supplemental_Legends.docx]

**SUPPLEMENTARY MATERIAL**

Supplemental_Table_S1 Supplemental_Table_S1 Summary information of proteomics.

Supplemental_Table_S2 DEPs in MZ*slbp2*Δ4-/--256 vs WT-256 and MZ*slbp2*Δ4-/--high vs WT-high.

Supplemental_Table_S3 DEGs in MZ*slbp2*Δ4-/--256 vs WT-256 and MZ*slbp2*Δ4-/--high vs WT-high.

Supplemental_Table_S4 Quantifications information of transcriptome changes in MZ*slbp2*Δ4-/--256 vs WT-256 and MZ*slbp2*Δ4-/--high vs WT-high.

Supplemental_Table_S5 Primers used in this study.
